# Supplementary material
Source: PubMed Central journal article supplement (PMC6795543)
Supplement: EMS84110-supplement-Supplementary_Figures.pdf [file EMS84110-supplement-Supplementary_Figures.pdf]

In the format provided by the authors and unedited.

# Fluid intelligence is supported by the multiple-demand system not the language system

Alexandra Woolgar <sup>1,2\*</sup>, John Duncan <sup>3,4</sup>, Facundo Manes <sup>2,5,6</sup> and Evelina Fedorenko <sup>7,8\*</sup>

---

<sup>1</sup>Perception in Action Research Centre (PARC), Department of Cognitive Science, Faculty of Human Sciences, Macquarie University, Sydney, New South Wales, Australia. <sup>2</sup>Australian Research Council Centre of Excellence in Cognition and its Disorders (CCD), Macquarie University, Sydney, New South Wales, Australia. <sup>3</sup>Medical Research Council Cognition and Brain Sciences Unit, University of Cambridge, Cambridge, UK. <sup>4</sup>Department of Psychology, University of Oxford, Oxford, UK. <sup>5</sup>Laboratory of Experimental Psychology and Neuroscience (LPEN), Institute of Cognitive and Translational Neuroscience (INCYT), INECO Foundation, Favaloro University, Buenos Aires, Argentina. <sup>6</sup>National Scientific and Technical Research Council (CONICET), Buenos Aires, Argentina. <sup>7</sup>Department of Psychiatry, Harvard Medical School, Boston, MA, USA. <sup>8</sup>Department of Psychiatry, Massachusetts General Hospital, Charlestown, MA, USA. \*e-mail: [alexandra.woolgar@mq.edu.au](mailto:alexandra.woolgar@mq.edu.au); [evelina.fedorenko@mgh.harvard.edu](mailto:evelina.fedorenko@mgh.harvard.edu)

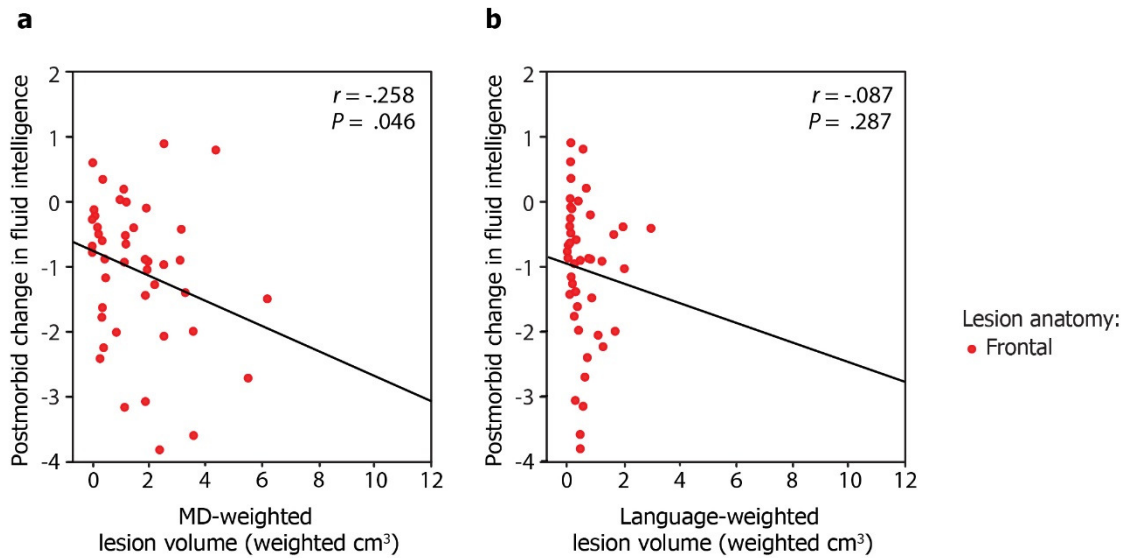

**Supplementary Figure 1. Correlation of a) MD-weighted lesion volume, and b) language-weighted lesion volume with postmorbidity change in fluid intelligence in patients with frontal lobe lesions**

Data are repeated from Figure 1, for patients with lesions affecting the frontal lobe (N=44), with Pearson's correlation coefficient  $r$ , corresponding  $P$ , and fit lines for the frontal lobe group. For each patient, lesion volume was weighted for the extent of damage to the MD and language systems using probabilistic maps which indicate the likelihood that each voxel belongs to the MD and language systems in healthy participants. We estimated postmorbidity change in fluid intelligence by comparing current function to estimated premorbidity function (postmorbidity minus premorbidity: a negative score indicates a deficit). The main result obtained in the frontal lobe: the extent to which lesions affected the MD, but not language, system predicted fluid intelligence deficit.

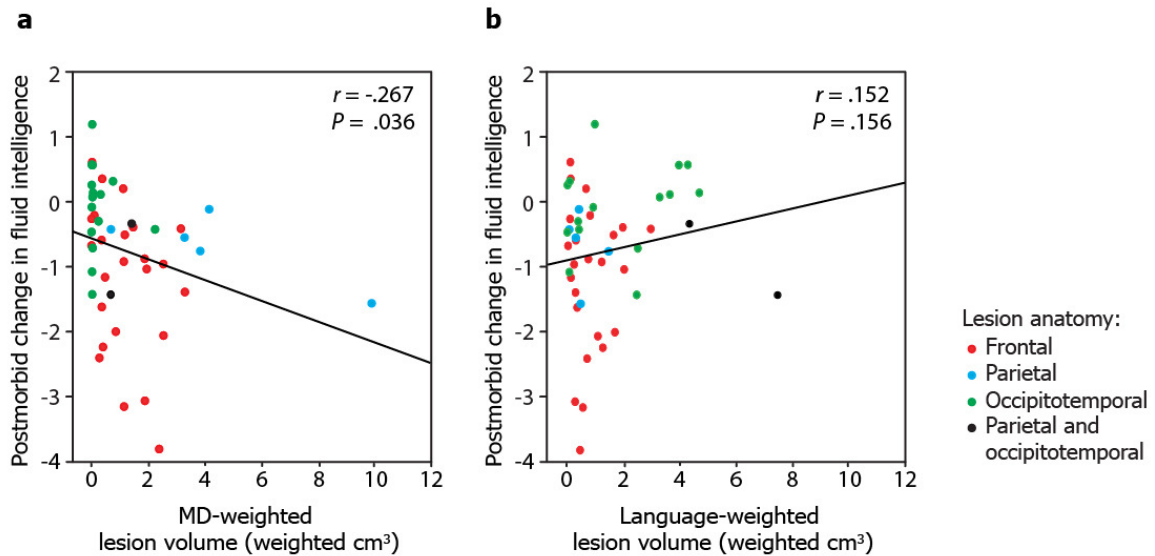

**Supplementary Figure 2. Correlation of a) MD-weighted lesion volume, and b) language-weighted lesion volume with postmorbidity change in fluid intelligence in patients with lesions affecting the left hemisphere**

Data are repeated from Figure 1, for patients with lesions affecting the left hemisphere lobe (N=46), with Pearson's correlation coefficient,  $r$ , corresponding  $P$ , and fit lines for this group of patients. For each patient, lesion volume was weighted for the extent of damage to the MD and language systems using probabilistic maps which indicate the likelihood that each voxel belongs to the MD and language systems in healthy participants. We estimated postmorbidity change in fluid intelligence by comparing current function to estimated premorbidity function (postmorbidity minus premorbidity: a negative score indicates a deficit). The main result obtained in the group of patients with lesions affecting the left hemisphere: the extent to which lesions affected the MD, but not language, system predicted fluid intelligence deficit.

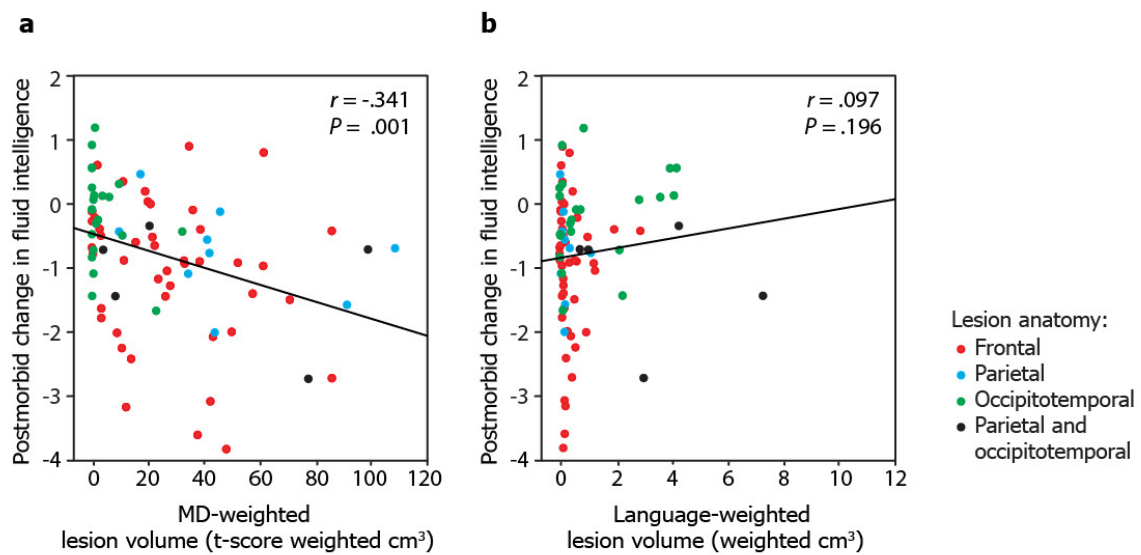

**Supplementary Figure 3. Correlation of a) MD-weighted lesion volume, and b) language-weighted lesion volume with postmorbidity change in fluid intelligence using a second set of probabilistic weighting maps**

For each patient (N=80), lesion volume was weighted for the extent of damage to the MD and language systems, using new probabilistic maps. For the MD system we weighted lesions using the *t*-score for the hard > easy contrast across the seven cognitively demanding tasks from [12]. For the language system we used a more restrictive probabilistic map which was the original language map (sentences > pseudowords) masked to exclude voxels that did not show activation in a contrast of reading sentences > passive viewing of fixation cross in at least 9 of the same 220 healthy participants. This removed default mode network activity from the language map. We estimated postmorbidity change in fluid intelligence by comparing current function to estimated premorbidity function (postmorbidity minus premorbidity: a negative score indicates a deficit). The result did not change: the extent to which lesions affected the MD, but not language, system predicted fluid intelligence deficit.
